# Supplementary material for: Amorphization of halide solid electrolytes for lithium super-ionic conductivity
Source: Royal Society of Chemistry journal article supplement (doi:10.1039/d4ta05362a), 2024-01-01
Supplement: d4ta05362a1.pdf [file d4ta05362a1.pdf]

## Supplementary data

### Amorphization of Halide solid electrolyte for Lithium Super-ionic Conductivity

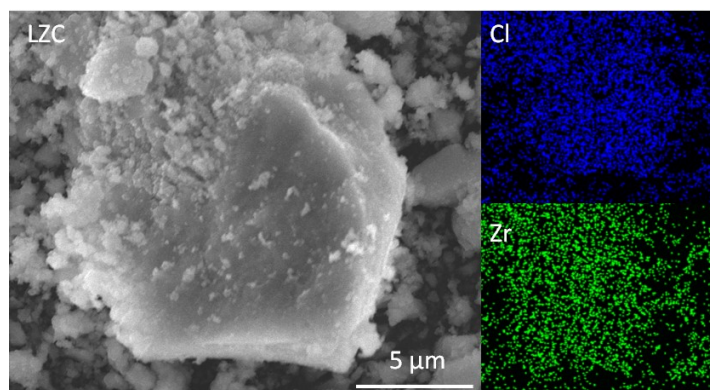

Figure S1. Cross-sectional SEM images and EDS mapping (Cl, Zr) of LZC.

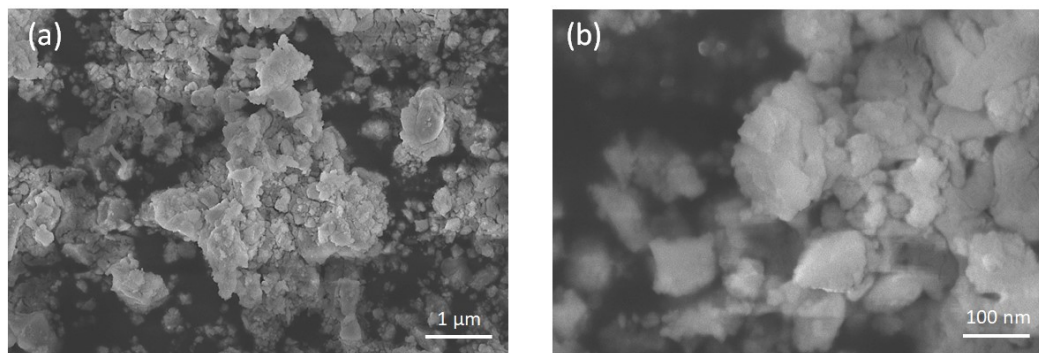

Figure S2. (a) 10Kx and (b) 50Kx SEM images of LZC powder.

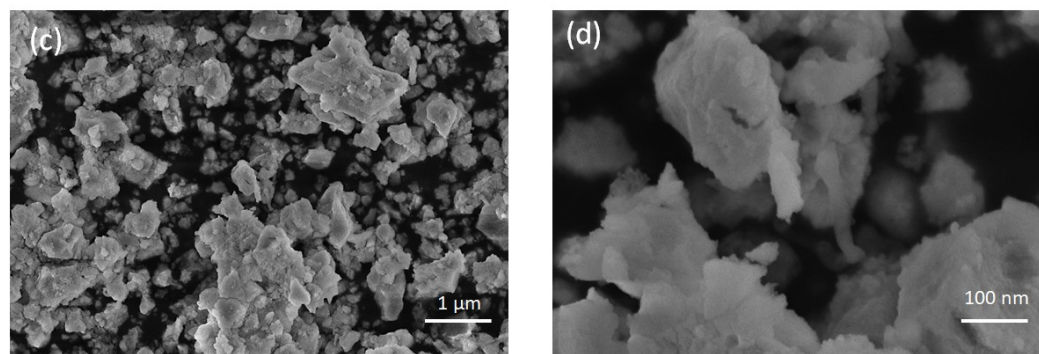

Figure S3. (a) 10Kx and (b) 50Kx SEM images of nc-LZCS<sub>0.2</sub> powder.

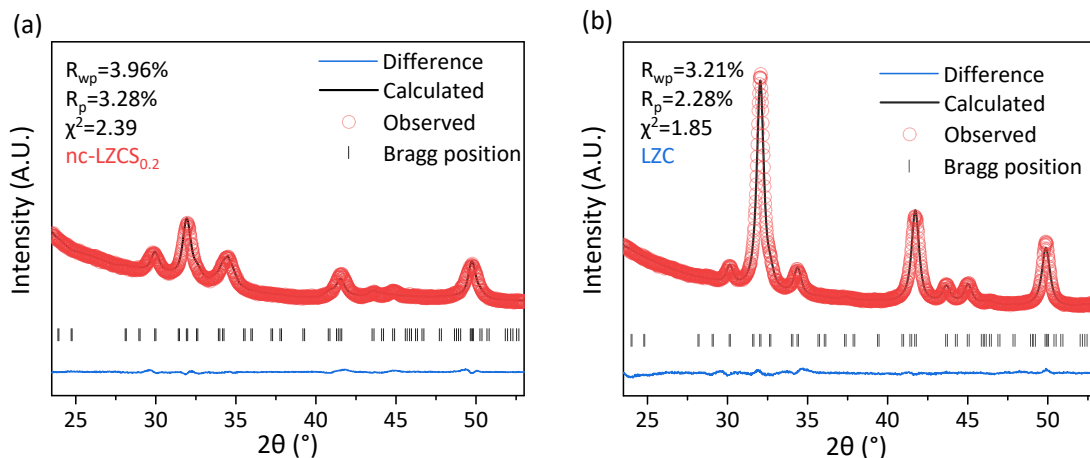

Figure S4. Rietveld refinement of the XRD patterns recorded for as-milled nc-LZCS<sub>0.2</sub> and LZC, respectively

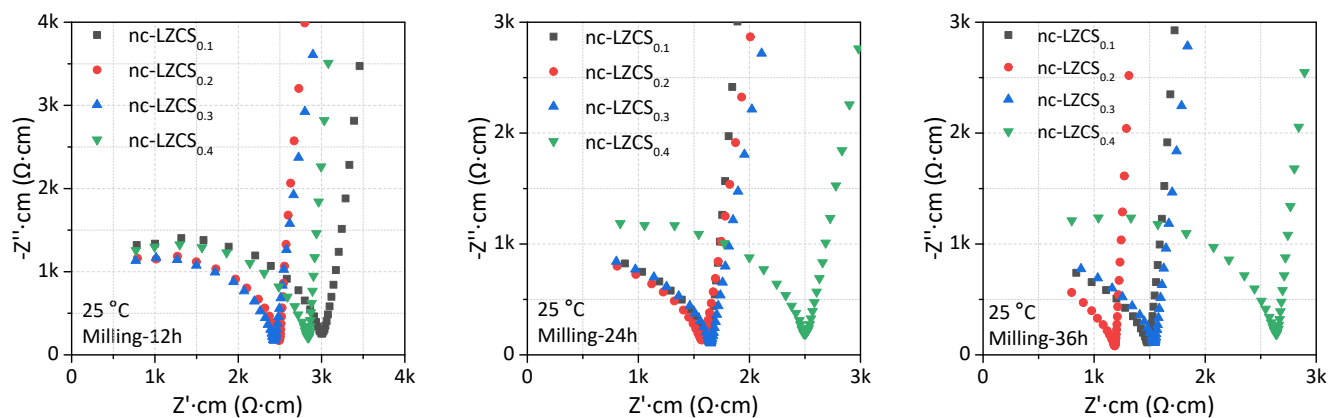

Figure S5. Nyquist plots of nc-LZCS, for different ball milling times at 25 °C.

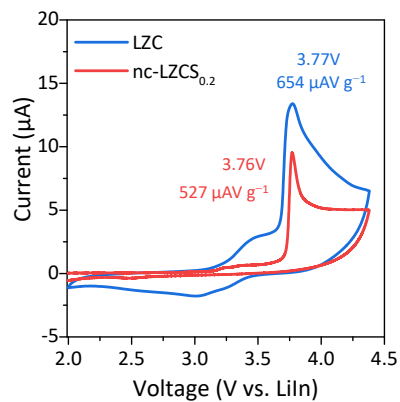

Figure S6. CV curve of LZC and nc-LZCS<sub>0.2</sub>.

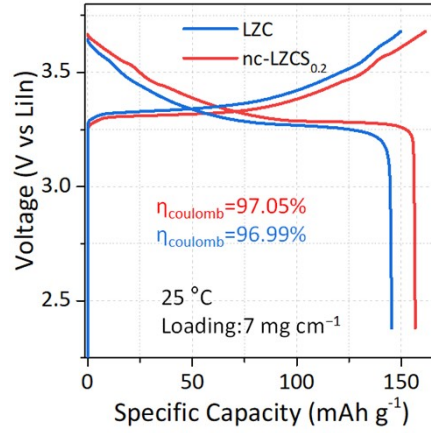

Figure S7. Initial charge/discharge curves obtained at 0.1C for LCO electrodes using nc-LZCS<sub>0.2</sub> and LZO, with the Coulombic efficiency

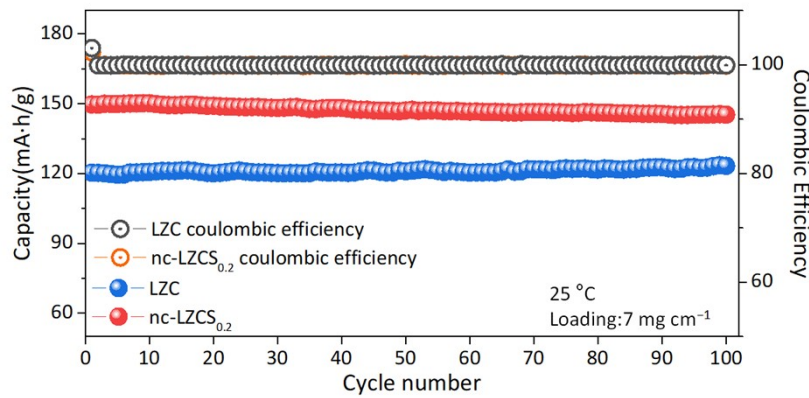

Figure S8. The long-term cycling performance of ASSLB Li-In/LPSC-LZO/LCO and Li-In/LPSC-nc-LZCS<sub>0.2</sub>/LCO cells at 0.3C.

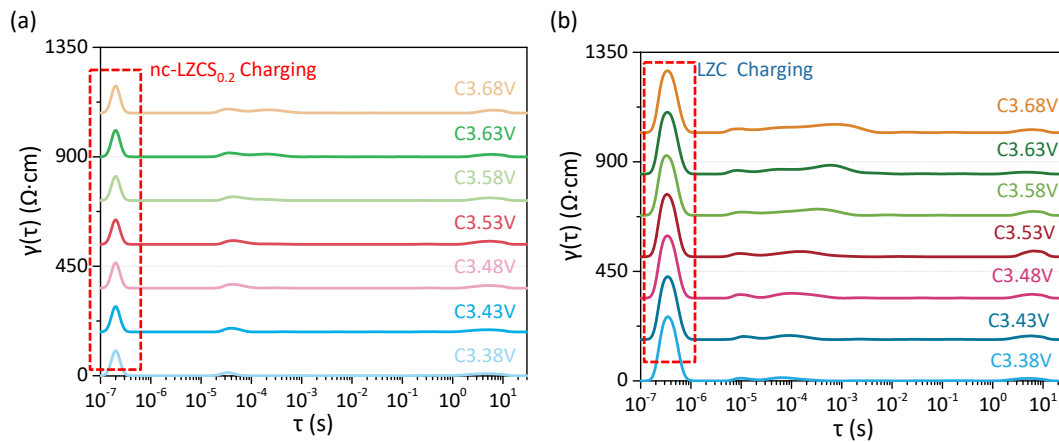

Figure S9. The DRT evolution of ASSLB using nc-LZCS<sub>0.2</sub> and LZO during first cycle at a 0.1C rate. (a) nc-LZCS<sub>0.2</sub> charging, (b) LZO charging.

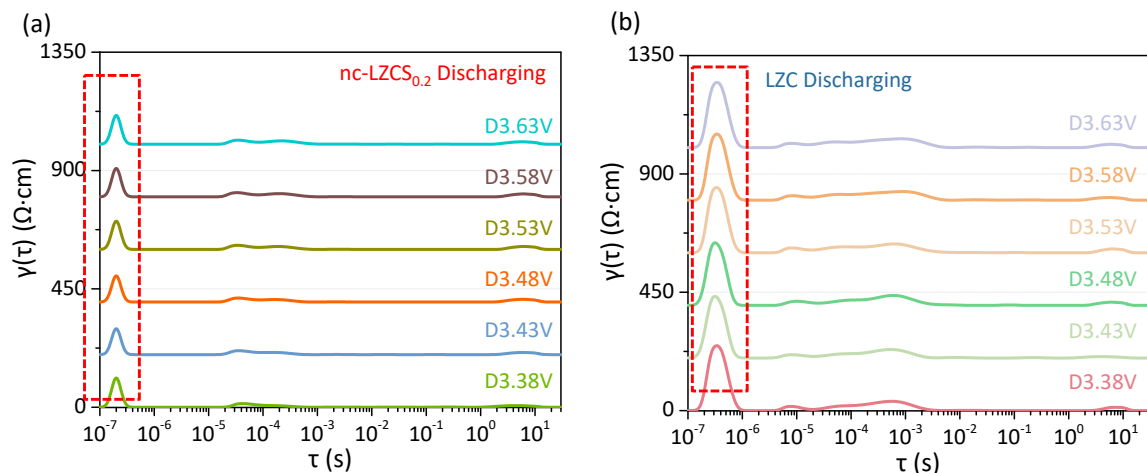

Figure S10. The DRT evolution of ASSSLB using nc-LZCS<sub>0.2</sub> and LZC during first cycle at a 0.1C rate. (a) nc-LZCS<sub>0.2</sub> discharging, (b) LZC discharging.

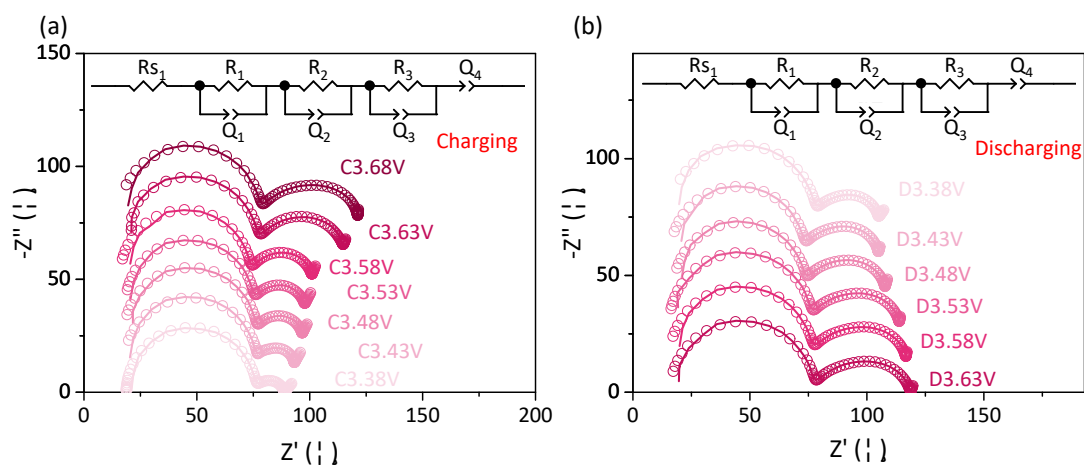

Figure S11. The EIS of ASSSLB using nc-LZCS<sub>0.2</sub> at charging and discharging process with the used equivalent circuit model as the inset, (a) charging process, (b) discharging process.

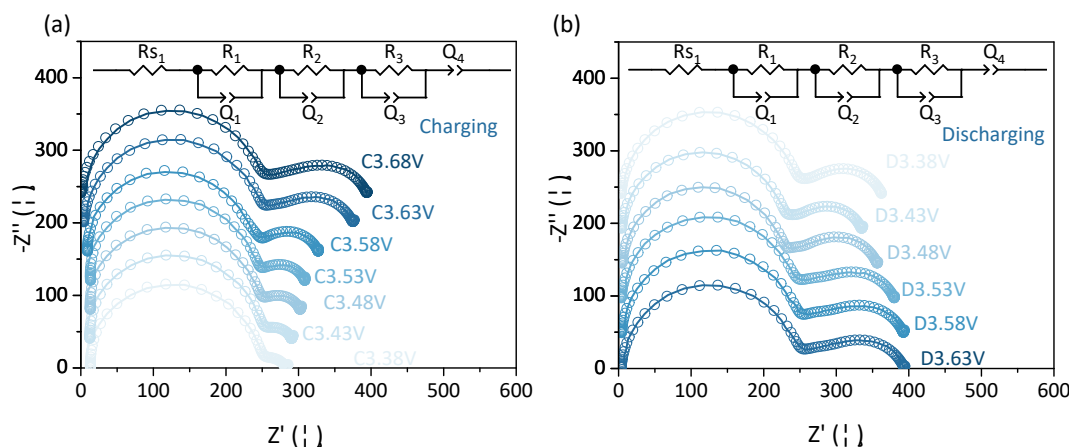

Figure S12. The EIS of ASSSLB using LZC at charging and discharging process with the used equivalent circuit model as the inset, (a) charging process, (b) discharging process.

**Table S1.** The refined lattice parameter values obtained from the XRD pattern of nc-LZCS<sub>0.2</sub>

| Atom                         | Wyckoff site | x                     | y                       | z                      | Occupancy               | B <sub>iso</sub> (Å <sup>2</sup> ) |
|------------------------------|--------------|-----------------------|-------------------------|------------------------|-------------------------|------------------------------------|
| Li1                          | 6g           | 0.28256               | 0                       | 0                      | 0.21500                 | 0.04525                            |
| Li2                          | 6h           | 0.35830               | 0                       | 0.5                    | 0.85251                 | 0.03530                            |
| Zr1                          | 1a           | 0                     | 0                       | 0                      | 0.66626                 | 0.01528                            |
| Zr2                          | 2d           | 0.33333               | 0.66667                 | 0.50549                | 0.54895                 | 0.00858                            |
| Zr3                          | 1b           | 0                     | 0                       | 0.5                    | 0.45448                 | 0.00545                            |
| Zr4                          | 2d           | 0.33333               | 0.66667                 | 0.98065                | 0.39149                 | 0.00514                            |
| Cl1                          | 6i           | 0.10755               | -0.10755                | 0.76565                | 0.93400                 | 0.01552                            |
| Cl2                          | 6i           | 0.22886               | -0.22886                | 0.25805                | 0.90553                 | 0.02559                            |
| Cl3                          | 6i           | 0.45418               | -0.45418                | 0.78802                | 0.91560                 | 0.01560                            |
| S1                           | 6i           | 0.10755               | -0.10755                | 0.76565                | 0.06600                 | 0.00828                            |
| S2                           | 6i           | 0.22886               | -0.22886                | 0.25805                | 0.09447                 | 0.00579                            |
| S3                           | 6i           | 0.45418               | -0.45418                | 0.78802                | 0.08440                 | 0.00158                            |
| a = 10.94428 Å               |              | b = 10.94428 Å        |                         | c = 5.92621 Å          |                         | Vol = 598.058 Å <sup>3</sup>       |
| Space group P <sub>3m1</sub> |              | χ <sup>2</sup> = 2.39 | R <sub>wp</sub> = 3.96% | R <sub>p</sub> = 3.28% | α = β = 90°<br>γ = 120° |                                    |

**Table S2.** The refined lattice parameter values obtained from the XRD pattern of LZC.

| Atom                         | Wyckoff site | x                     | y                       | z                       | Occupancy               | B <sub>iso</sub> (Å <sup>2</sup> ) |
|------------------------------|--------------|-----------------------|-------------------------|-------------------------|-------------------------|------------------------------------|
| Li1                          | 6g           | 0.55957               | 0                       | 0                       | 0.6357                  | 0.35894                            |
| Li2                          | 6h           | 0.34962               | 0                       | 0.5                     | 0.38752                 | 0.34581                            |
| Zr1                          | 1a           | 0                     | 0                       | 0                       | 0.59758                 | 0.00251                            |
| Zr2                          | 2d           | 0.33333               | 0.66667                 | 0.51022                 | 0.54860                 | 0.00381                            |
| Zr3                          | 1b           | 0                     | 0                       | 0.5                     | 0.57245                 | 0.00185                            |
| Zr4                          | 2d           | 0.33333               | 0.66667                 | 0.96945                 | 0.36955                 | 0.00035                            |
| Cl1                          | 6i           | 0.10938               | -0.10938                | 0.77516                 | 0.99995                 | 0.01585                            |
| Cl2                          | 6i           | 0.22045               | -0.22045                | 0.24275                 | 0.99998                 | 0.04582                            |
| Cl3                          | 6i           | 0.45855               | -0.45855                | 0.68545                 | 0.99980                 | 0.01556                            |
| a = 10.97022 Å               |              | b = 10.97022 Å        |                         | c = 5.85746 Å           |                         | Vol = 618.690 Å <sup>3</sup>       |
| Space group P <sub>3m1</sub> |              | χ <sup>2</sup> = 1.85 | R <sub>wp</sub> = 3.21% | R <sub>p</sub> = 2.28 % | α = β = 90°<br>γ = 120° |                                    |

**Table S3.** Fitting parameters of ASSLB using nc-LZCS<sub>0.2</sub> at charging and discharging process.

| Sample                         | Rs1  | R1   | CPE1-T   | CPE2-P | R2    | CPE2-T   | CPE2-P | R3    | CPE3-T   | CPE3-P | CPE4-T | CPE4-P |
|--------------------------------|------|------|----------|--------|-------|----------|--------|-------|----------|--------|--------|--------|
| nc-LZCS <sub>0.2</sub> -C3.38V | 76.9 | 13.2 | 1.583E-9 | 0.9893 | 18.2  | 3.857E-6 | 0.6258 | 25.76 | 2.559E-5 | 0.5456 | 0.6487 | 0.4649 |
| nc-LZCS <sub>0.2</sub> -C3.43V | 76.9 | 12.1 | 1.734E-9 | 0.9527 | 18.44 | 5.254E-6 | 0.4291 | 31.47 | 6.985E-5 | 0.2223 | 0.5648 | 0.2552 |
| nc-LZCS <sub>0.2</sub> -C3.48V | 77.0 | 28.6 | 1.934E-9 | 0.9928 | 16.51 | 6.856E-6 | 0.2477 | 18.22 | 4.894E-5 | 0.9662 | 0.2255 | 0.3424 |
| nc-LZCS <sub>0.2</sub> -C3.53V | 76.0 | 14.5 | 1.324E-9 | 0.9827 | 11.31 | 8.485E-6 | 0.2862 | 56.73 | 2.575E-4 | 0.8857 | 0.3116 | 0.2633 |
| nc-LZCS <sub>0.2</sub> -C3.58V | 74.6 | 23.7 | 2.896E-9 | 0.8768 | 18.31 | 8.482E-6 | 0.7348 | 33.64 | 8.443E-5 | 0.5975 | 0.6237 | 0.3822 |
| nc-LZCS <sub>0.2</sub> -C3.63V | 77.8 | 11.5 | 2.236E-9 | 0.9725 | 20.2  | 5.527E-6 | 0.3248 | 25.87 | 9.352E-5 | 0.2436 | 0.1323 | 0.1253 |
| nc-LZCS <sub>0.2</sub> -C3.68V | 79.0 | 14.3 | 2.863E-9 | 0.9786 | 18.2  | 8.933E-5 | 0.8782 | 45.48 | 6.231E-5 | 0.3556 | 0.1782 | 0.2146 |
| nc-LZCS <sub>0.2</sub> -D3.63V | 78.4 | 26.9 | 1.824E-9 | 0.9254 | 16.66 | 1.944E-5 | 0.9127 | 54.93 | 7.388E-5 | 0.5218 | 0.1546 | 0.2668 |
| nc-LZCS <sub>0.2</sub> -D3.58V | 77.4 | 22.4 | 1.833E-9 | 0.8975 | 18.19 | 4.764E-5 | 0.7157 | 45.61 | 2.847E-4 | 0.4699 | 0.1627 | 0.4564 |
| nc-LZCS <sub>0.2</sub> -D3.53V | 76.9 | 14.5 | 1.724E-9 | 0.9278 | 11.75 | 6.224E-6 | 0.8624 | 14.40 | 4.954E-5 | 0.6756 | 0.3919 | 0.4242 |
| nc-LZCS <sub>0.2</sub> -D3.48V | 74.4 | 22.6 | 1.862E-9 | 0.9862 | 17.98 | 8.580E-5 | 0.4827 | 56.53 | 6.482E-5 | 0.7847 | 0.2494 | 0.2323 |
| nc-LZCS <sub>0.2</sub> -D3.43V | 73.9 | 23.6 | 1.719E-9 | 0.9785 | 19.52 | 3.857E-5 | 0.7815 | 22.87 | 6.555E-5 | 0.6654 | 0.6558 | 0.3232 |
| nc-LZCS <sub>0.2</sub> -D3.38V | 79.1 | 10.5 | 1.715E-9 | 0.9938 | 25.85 | 4.563E-6 | 0.7895 | 34.89 | 4.336E-4 | 0.5466 | 0.5279 | 0.1382 |

**Table S4.** Fitting parameters of ASSLB using LZC at charging and discharging process

| Sample     | Rs1   | R1    | CPE1-T   | CPE2-P | R2    | CPE2-T   | CPE2-P | R3    | CPE3-T   | CPE3-P | CPE4-T | CPE4-P |
|------------|-------|-------|----------|--------|-------|----------|--------|-------|----------|--------|--------|--------|
| LZC-C3.38V | 252.4 | 17.82 | 1.691E-9 | 0.9451 | 21.28 | 2.413E-5 | 0.4434 | 12.67 | 2.444E-5 | 0.3979 | 0.8896 | 0.1313 |
| LZC-C3.48V | 253.3 | 25.53 | 2.653E-9 | 0.9312 | 35.58 | 8.241E-5 | 0.4292 | 43.59 | 4.922E-5 | 0.6454 | 0.5442 | 0.5464 |
| LZC-C3.53V | 253.0 | 35.78 | 2.314E-9 | 0.9763 | 55.81 | 6.044E-6 | 0.7864 | 21.29 | 5.734E-4 | 0.7531 | 0.6824 | 0.4575 |
| LZC-C3.58V | 244.9 | 38.24 | 1.229E-9 | 0.9884 | 69.79 | 7.442E-6 | 0.5722 | 45.33 | 9.896E-5 | 0.9410 | 0.8938 | 0.1742 |
| LZC-C3.63V | 258.4 | 42.95 | 3.412E-9 | 0.9647 | 84.42 | 3.838E-6 | 0.9533 | 26.45 | 7.429E-5 | 0.2666 | 0.9249 | 0.3653 |
| LZC-C3.68V | 258.6 | 87.11 | 6.103E-9 | 0.8239 | 82.20 | 3.653E-5 | 0.4376 | 37.16 | 5.637E-5 | 0.4786 | 0.7260 | 0.5327 |
| LZC-D3.63V | 257.9 | 68.67 | 1.357E-9 | 0.9954 | 79.61 | 1.501E-5 | 0.6252 | 79.31 | 3.425E-5 | 0.9808 | 0.4584 | 0.6738 |
| LZC-D3.58V | 256.7 | 35.95 | 2.845E-9 | 0.9192 | 57.84 | 6.467E-6 | 0.7433 | 65.52 | 8.514E-5 | 0.2907 | 0.5105 | 0.8823 |
| LZC-D3.53V | 251.9 | 21.10 | 1.630E-9 | 0.9273 | 52.95 | 4.325E-5 | 0.8943 | 44.39 | 1.773E-4 | 0.3843 | 0.3242 | 0.4642 |
| LZC-D3.48V | 240.0 | 22.34 | 1.284E-9 | 0.9555 | 47.44 | 3.262E-5 | 0.7895 | 23.69 | 2.682E-4 | 0.2568 | 0.2353 | 0.5543 |
| LZC-D3.43V | 240.5 | 15.38 | 1.053E-9 | 0.8668 | 35.25 | 2.863E-5 | 0.6654 | 34.56 | 4.666E-5 | 0.5254 | 0.3265 | 0.5665 |
| LZC-D3.38V | 256.9 | 13.90 | 1.669E-9 | 0.9716 | 39.73 | 7.687E-5 | 0.7469 | 49.78 | 3.966E-5 | 0.8152 | 0.4321 | 0.4027 |
